# Supplementary material for: Dielectric Barrier Discharge Plasma Jet (DBDjet) Processed Reduced Graphene Oxide/Polypyrrole/Chitosan Nanocomposite Supercapacitors
Source: MDPI journal article supplement (doi:10.3390/polym13203585), 2021-10-18
Supplement: s1 [file s1]

## (Supplementary Information)

### Dielectric barrier discharge plasma jet (DBDjet) processed reduced graphene oxide/polypyrrole/chitosan nanocomposite supercapacitors

Chen Liu<sup>1,2</sup>, Cheng-Wei Hung<sup>3</sup>, I-Chung Cheng<sup>3</sup>, Cheng-Che Hsu<sup>4</sup>, I-Chun Cheng<sup>5,6,7</sup>, Jian-Zhang Chen<sup>1,2,7</sup>

<sup>1</sup> Graduate Institute of Applied Mechanics, National Taiwan University, Taipei City 10617, Taiwan

<sup>2</sup> Advanced Research Center for Green Materials Science and Technology, National Taiwan University, Taipei City 10617, Taiwan

<sup>3</sup> Department of Mechanical Engineering, National Taiwan University, Taipei City 10617, Taiwan

<sup>4</sup> Department of Chemical Engineering, National Taiwan University, Taipei City 10617, Taiwan

<sup>5</sup> Graduate Institute of Photonics and Optoelectronics, National Taiwan University, Taipei City 10617, Taiwan

<sup>6</sup> Department of Electrical Engineering, National Taiwan University, Taipei City 10617, Taiwan

<sup>7</sup> Innovative Photonics Advanced Research Center (i-PARC), National Taiwan University, Taipei City 10617, Taiwan

\* Correspondence: TEL: +886-2-33665694; Email: jchen@ntu.edu.tw (J.Z.C.)

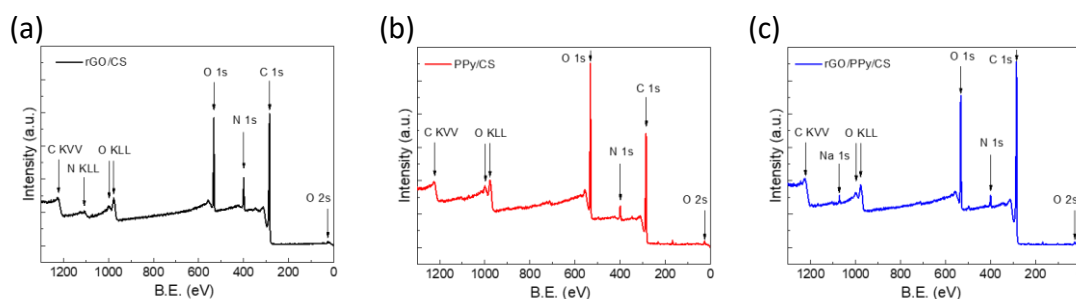

**Figure S1.** XPS analysis of electrodes for (a) rGO/CS, (b) PPy/CS, and (c)

rGO/PPy/CS pastes on carbon cloth.

**Table S1.** Atomic ratios of C, O, N, Na, S, and Si as calculated from XPS spectra.

|            | C1s   | O1s   | N1s  | Na1s | S2p  | Si2p |
|------------|-------|-------|------|------|------|------|
| rGO/CS     | 72.9% | 17.0% | 9.7% | 0.4% | 0.0% | 0.0% |
| PPy/CS     | 63.7% | 28.3% | 5.3% | 0.6% | 1.1% | 1.0% |
| rGO/PPy/CS | 76.1% | 18.2% | 3.5% | 0.7% | 0.7% | 0.9% |

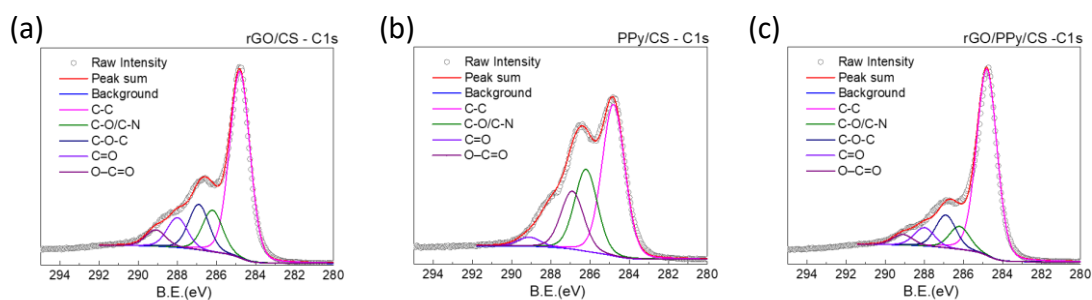

**Figure S2.** XPS spectra of C1s for (a) rGO/CS, (b) PPy/CS, and (c) rGO/PPy/CS paste on carbon cloth.

**Table S2.** XPS C1s spectra of electrode with rGO/CS, PPy/CS and rGO/PPy/CS pastes on carbon cloth

| Bonding states/    | C-C     | C-O/C-N | C-O-C   | C=O   | O-C=O   |
|--------------------|---------|---------|---------|-------|---------|
| Binding energy(eV) | (284.8) | (286.2) | (286.9) | (288) | (289.2) |
| rGO/CS             | 58.4%   | 13.0%   | 14.2%   | 9.3%  | 5.1%    |
| PPy/CS             | 45.1%   | 24.4%   | 17.3%   | 10.5% | 2.7%    |
| rGO/PPy/CS         | 68.9%   | 8.5%    | 12.0%   | 6.7%  | 3.9%    |
| Reference          | [1]     | [1]     | [2]     | [1]   | [3]     |

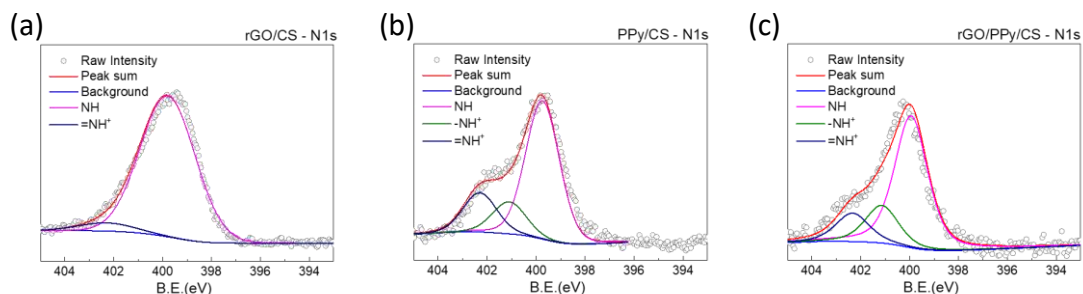

**Figure S3.** XPS spectra of N1s for (a) rGO/CS, (b) PPy/CS, and (c) rGO/PPy/CS paste on carbon cloth.

**Table S3.** XPS N1s spectra of electrode with rGO/CS, PPy/CS and rGO/PPy/CS pastes on carbon cloth

| Bonding states/     | $-NH-$  | $-NH^+-$ | $=NH^+-$ |
|---------------------|---------|----------|----------|
| Binding energy (eV) | (399.8) | (401.1)  | (402.3)  |
| rGO/CS              | 94.5%   | 0.0%     | 5.5%     |
| PPy/CS              | 66.0%   | 15.3%    | 18.7%    |

|            |       |       |       |
|------------|-------|-------|-------|
| rGO/PPy/CS | 66.6% | 19.0% | 14.4% |
| Reference  | [4]   | [4]   | [4]   |

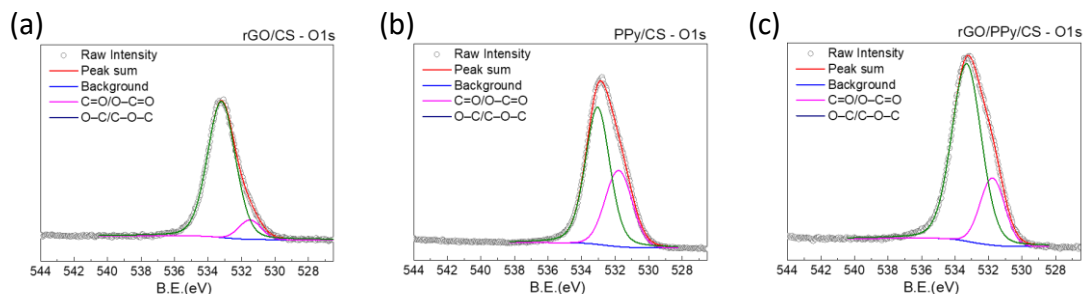

**Figure S4.** XPS spectra of O1s for (a) rGO/CS, (b) PPy/CS, and (c) rGO/PPy/CS pastes on carbon cloth.

**Table S4.** XPS O1s spectra of electrode with rGO/CS, PPy/CS, and rGO/PPy/CS pastes on carbon cloth

| Bonding states/<br>Binding energy (eV) | C=O / O-C=O<br>(531.8) | O-C / C-O-C<br>(533.1) |
|----------------------------------------|------------------------|------------------------|
| rGO/CS                                 | 9.4%                   | 90.6%                  |
| PPy/CS                                 | 35.1%                  | 64.9%                  |
| rGO/PPy/CS                             | 22.4%                  | 77.6%                  |
| reference                              | [4]                    | [4]                    |

**Table S5.** Comparison of areal capacitance of SCs with different materials listed in literatures.

| Material             | Electrolyte                                                  | Areal capacitance                                       | Year | Ref.       |
|----------------------|--------------------------------------------------------------|---------------------------------------------------------|------|------------|
| rGO/PPy/CS           | 1 M H <sub>2</sub> SO <sub>4</sub> /PVA<br>gel electrolyte   | 72.79 mF/cm <sup>2</sup><br>@ 0.333 mA/cm <sup>2</sup>  | 2021 | this study |
| PEDOT/rGO/CS         | 1 M H <sub>2</sub> SO <sub>4</sub> /PVA<br>gel electrolyte   | 399.33 mF/cm <sup>2</sup><br>@ 3.333 mA/cm <sup>2</sup> | 2021 | [5]        |
| NNA/PPy              | 0.5 M Na <sub>2</sub> SO <sub>4</sub><br>aqueous electrolyte | 376.90 mF/cm <sup>2</sup><br>@ 1 mV/s                   | 2015 | [6]        |
| rGO/PANI/CS          | 1 M H <sub>2</sub> SO <sub>4</sub> /PVA<br>gel electrolyte   | 195.83 mF/cm <sup>2</sup><br>@ 0.333 mA/cm <sup>2</sup> | 2020 | [7]        |
| rGO/SnO <sub>2</sub> | 1 M H <sub>2</sub> SO <sub>4</sub> /PVA<br>gel electrolyte   | 34.73 mF/cm <sup>2</sup><br>@ 0.083 mA/cm <sup>2</sup>  | 2021 | [8]        |

|                        |                                                                |                                                        |      |      |
|------------------------|----------------------------------------------------------------|--------------------------------------------------------|------|------|
| PPy/GO                 | 1 M KCl/filter paper<br>solid-state electrolyte                | 22.80 mF/cm <sup>2</sup><br>@ 0.1 mA/cm <sup>2</sup>   | 2014 | [9]  |
| rGO                    | 1 M H <sub>2</sub> SO <sub>4</sub> /PVA<br>gel electrolyte     | 22.43 mF/cm <sup>2</sup><br>@ 0.083 mA/cm <sup>2</sup> | 2019 | [10] |
| e-WO <sub>3</sub> /PPy | H <sub>2</sub> SO <sub>4</sub> /PVA<br>solid-state electrolyte | 11.38 mF/cm <sup>2</sup><br>@ 20 mV/s                  | 2015 | [11] |
| GO/rGO                 | 1 M TEABF <sub>4</sub><br>liquid electrolyte                   | ~2.70 mF/cm <sup>2</sup><br>@ 20 mV/s                  | 2011 | [12] |

Note. NNC: Ni nanocones.

## References

1. Parnell, C.M.; Chhetri, B.P.; Mitchell, T.B.; Watanabe, F.; Kannarpady, G.; RanguMagar, A.B.; Zhou, H.; Alghazali, K.M.; Biris, A.S.; Ghosh, A. simultaneous electrochemical Deposition of Cobalt Complex and poly (pyrrole) thin Films for supercapacitor electrodes. *Scientific Reports* **2019**, *9*, 1-13.
2. Zhang, L.; Li, Y.; Zhang, L.; Li, D.-W.; Karpuzov, D.; Long, Y.-T. Electrocatalytic oxidation of NADH on graphene oxide and reduced graphene oxide modified screen-printed electrode. *International Journal of Electrochemical Science* **2011**, *6*, 819-829.
3. Sun, K.G.; Chung, J.S.; Hur, S.H. Durability improvement of Pt/RGO catalysts for PEMFC by low-temperature self-catalyzed reduction. *Nanoscale research letters* **2015**, *10*, 1-7.
4. Bashid, H.A.A.; Lim, H.N.; Kamaruzaman, S.; Rashid, S.A.; Yunus, R.; Huang, N.M.; Yin, C.Y.; Rahman, M.M.; Altarawneh, M.; Jiang, Z.T. Electrodeposition of polypyrrole and reduced graphene oxide onto carbon bundle fibre as electrode for supercapacitor. *Nanoscale research letters* **2017**, *12*, 1-10.
5. Tseng, C.-H.; Lin, H.-H.; Hung, C.-W.; Cheng, I.-C.; Luo, S.-C.; Cheng, I.-C.; Chen, J.-Z. Electropolymerized Poly (3, 4-ethylenedioxythiophene)/Screen-Printed Reduced Graphene Oxide–Chitosan Bilayer Electrodes for Flexible Supercapacitors. *ACS Omega* **2021**.
6. Xu, C.; Li, Z.; Yang, C.; Zou, P.; Xie, B.; Lin, Z.; Zhang, Z.; Li, B.; Kang, F.; Wong, C.P. An ultralong, highly oriented nickel-nanowire-array electrode scaffold for high-performance compressible pseudocapacitors. *Advanced Materials* **2016**, *28*, 4105-4110.
7. Tseng, C.-H.; Hsin, J.-C.; Tsai, J.-H.; Chen, J.-Z. Dielectric-barrier-discharge jet

treated flexible supercapacitors with carbon cloth current collectors of long-lasting hydrophilicity. *Journal of the Electrochemical Society* **2020**, *167*, 116511.

8. Chang, J.-H.; Chen, S.-Y.; Kuo, Y.-L.; Yang, C.-R.; Chen, J.-Z. Carbon Dioxide Tornado-Type Atmospheric-Pressure-Plasma-Jet-Processed rGO-SnO<sub>2</sub> Nanocomposites for Symmetric Supercapacitors. *Materials* **2021**, *14*, 2777.
9. Zhou, H.; Han, G.; Xiao, Y.; Chang, Y.; Zhai, H.-J. Facile preparation of polypyrrole/graphene oxide nanocomposites with large areal capacitance using electrochemical codeposition for supercapacitors. *Journal of Power Sources* **2014**, *263*, 259-267.
10. Fan, C.-F.; Chien, Y.-C.; Hsu, C.-C.; Cheng, I.-C.; Chien, L.-H.; Chen, J.-Z. Flexible reduced graphene oxide supercapacitors processed using atmospheric-pressure plasma jet under various temperatures adjusted by flow rate and jet-substrate distance. *Materials Research Express* **2019**, *7*, 015602.
11. Zhu, M.; Huang, Y.; Huang, Y.; Meng, W.; Gong, Q.; Li, G.; Zhi, C. An electrochromic supercapacitor and its hybrid derivatives: quantifiably determining their electrical energy storage by an optical measurement. *Journal of Materials Chemistry A* **2015**, *3*, 21321-21327.
12. Gao, W.; Singh, N.; Song, L.; Liu, Z.; Reddy, A.L.M.; Ci, L.; Vajtai, R.; Zhang, Q.; Wei, B.; Ajayan, P.M. Direct laser writing of micro-supercapacitors on hydrated graphite oxide films. *Nature Nanotechnology* **2011**, *6*, 496-500.
